# Supplementary material
Source: publisher site journal article supplement (https://www.spandidos-publications.com/1575/downloadSupplementary)

Figure S1. Transfection of miR-196a mimic and inhibitor. (A) Transfection of miR-196a mimic promoted miR-196a expression in OVCAR3 and CAOV-3 cells. (B) Transfection of miR-196a inhibitor reduced miR-196a expression in OVCAR3 and CAOV-3 cells. \*\*\* $P < 0.001$ . miR, microRNA; NC, negative control; RT-PCR, reverse transcription-polymerase chain reaction.

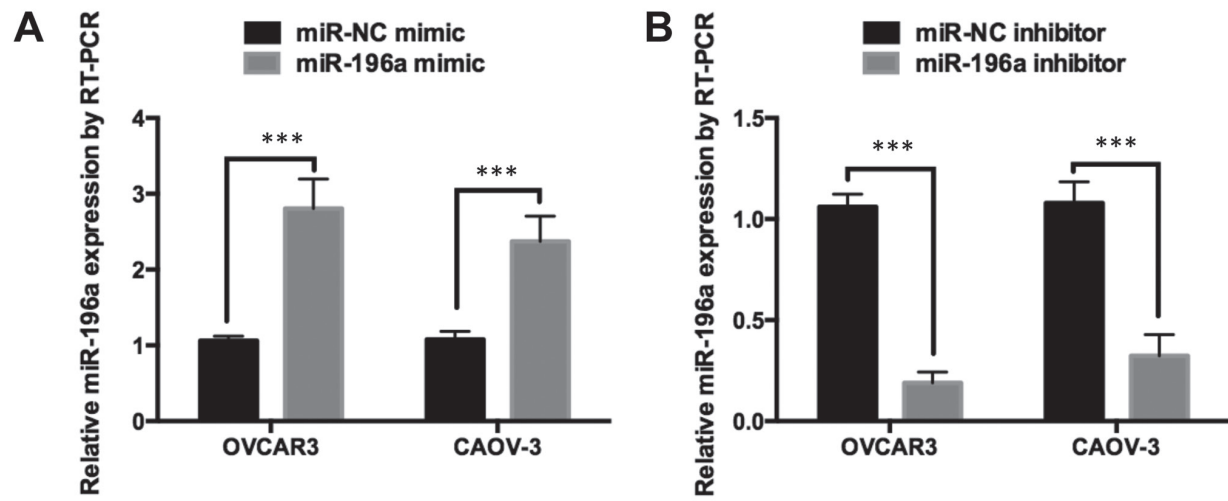

Figure S2. Flow cytometry was conducted to detect OVCAR3 and CAOV-3 cells apoptosis. miR-196a inhibitor or miR-196a mimic was transfected into OVCAR3 and CAOV-3 cells, and miR-196a inhibitor increased apoptosis compared with controls. miR, microRNA.

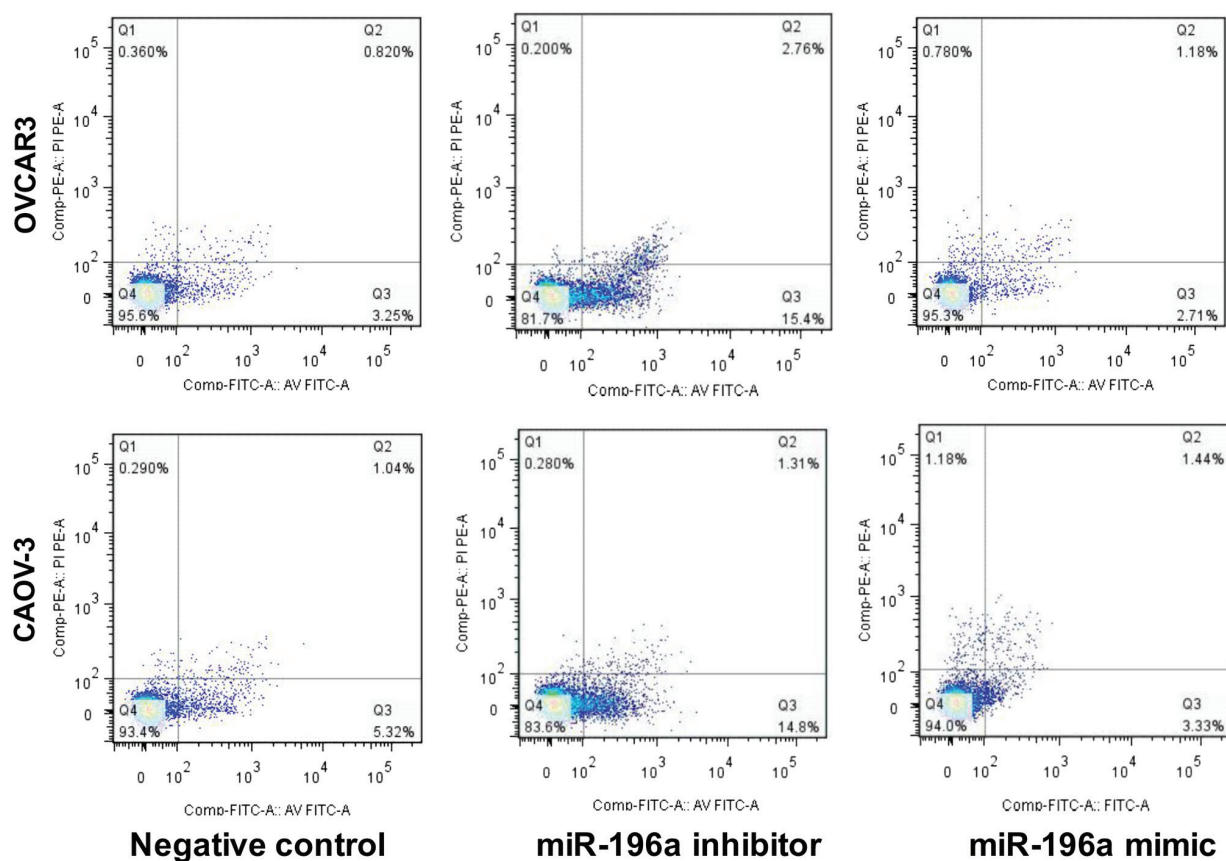

Figure S3. Overexpression and knockdown of DDX3 in OVCAR3 cells. (A) Western blot analysis revealed that transfection with pcDNA-DDX3 increased DDX3 protein expression in OVCAR3 cells. (B) Western blot analysis revealed that transfection with shDDX3 decreased DDX3 protein expression in OVCAR3 cells. \*\* $P < 0.01$  and \*\*\* $P < 0.001$ . sh, short hairpin; DDX3, DEAD box RNA helicase 3; Ctrl, control.

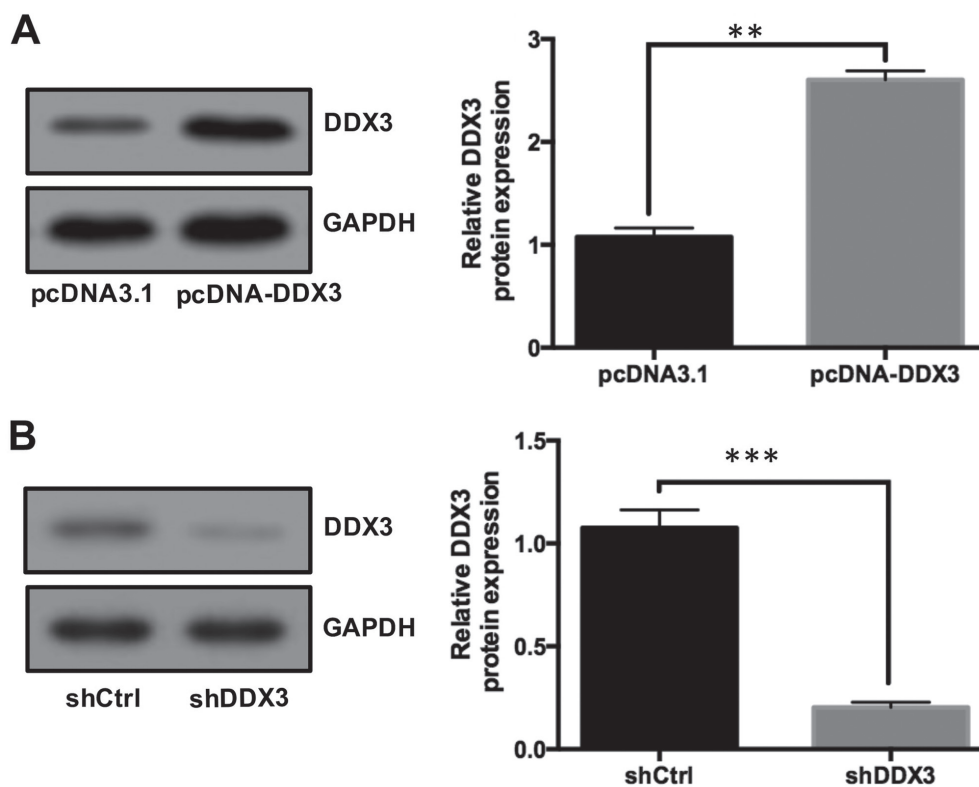

Figure S4. Flow cytometry was conducted to detect OVCAR3 cell apoptosis. pcDNA-DDX3 or shDDX3 was transfected into OVCAR3 cells, and it was demonstrated that DDX3 increased cell apoptosis compared with controls. sh, short hairpin; DDX3, DEAD box RNA helicase 3.

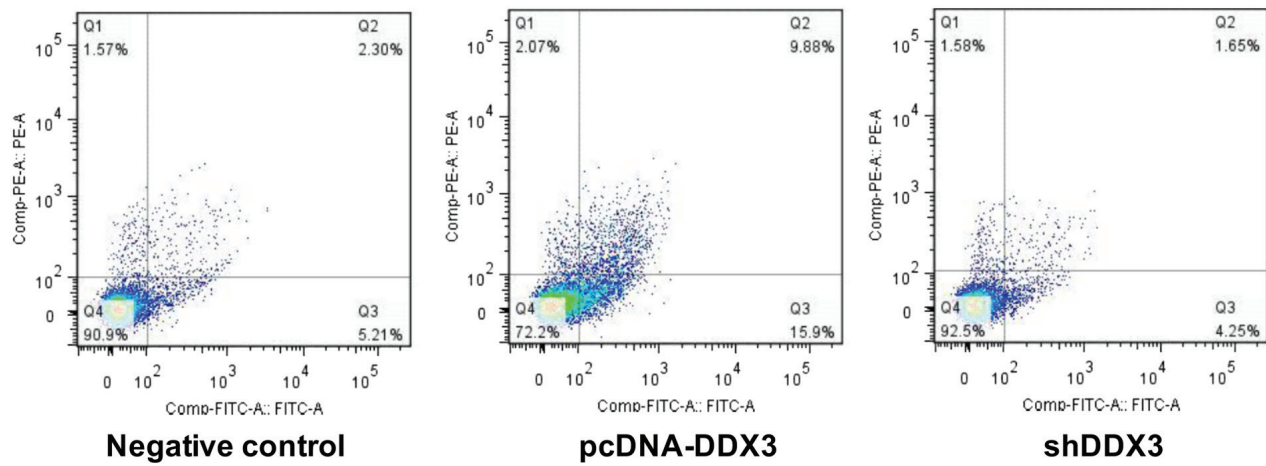

Figure S5. OVCAR3 cells were pretreated with DMSO or LY294002 for 6 h and then transfected with miR-196a mimic, miR-196a inhibitor, pcDNA-DDX3, shDDX3 and corresponding control for 24 h. Flow cytometry was used to evaluate the cell apoptotic rate. miR, microRNA; sh, short hairpin; DDX3, DEAD box RNA helicase 3.

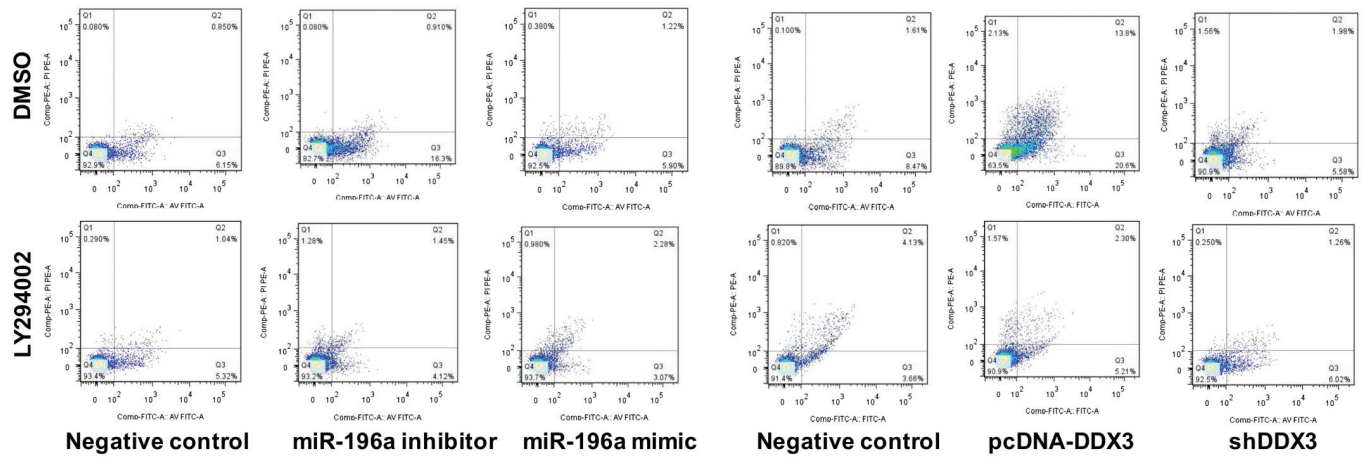

Supplement: Supplementary file 1 [file downloadSupplementary]
